# Supplementary material
Source: PubMed Central journal article supplement (PMC5710406)
Supplement: jamadermatol-153-983-s001.pdf [file jamadermatol-153-983-s001.pdf]

## Supplementary Online Content

Burns EM, Guroji P, Ahmad I, et al. Association of vitamin D receptor polymorphisms with the risk of nonmelanoma skin cancer in adults. *JAMA Dermatol*. Published online August 23, 2017.  
doi:10.1001/jamadermatol.2017.1976

**eTable 1.** VDR Polymorphism Primer Details

**eTable 2.** Genotype and Allele Frequencies of the *VDR* Polymorphisms in Men

**eTable 3.** Genotype and Allele Frequencies of the *VDR* Polymorphisms in Women

**eTable 4.** Genotype Frequencies by Non-Melanoma Skin Cancer Type

This supplementary material has been provided by the authors to give readers additional information about their work.

**eTable 1.** VDR Polymorphism Primer Details

| <b>Primer</b> | <b>Sequence (5' – 3')</b>      | <b>T<sub>m</sub> (°C)</b> |
|---------------|--------------------------------|---------------------------|
| <i>Apal</i>   | F:<br>GCAAAGATAGCAGAGCAGAGTTCC | 57                        |
|               | R:<br>AGGTTGGACAGGAGAGAGAATGG  |                           |
| <i>BsmI</i>   | F: GGGGAGTATGAAGGACAAAGAC      | 54                        |
|               | R: TTCTCACCTCTAACCAGCGG        |                           |
| <i>TaqI</i>   | F: CAGAGCATGGACAGGGAGCAAG      | 65                        |
|               | R:<br>GCAACTCCTCATGGCTGAGGTCTC |                           |

**eTable 2.** Genotype and Allele Frequencies of the *VDR* Polymorphisms in Men

|             |               | Cases |      | Controls |      | p-value             | Odds Ratios and 95% Confidence Intervals |             |         |             |
|-------------|---------------|-------|------|----------|------|---------------------|------------------------------------------|-------------|---------|-------------|
|             |               | N     | (%)  | N        | (%)  |                     | Crude OR                                 | 95% CI      | Adj OR* | 95% CI      |
| <i>Apal</i> |               |       |      |          |      | 0.1684 <sup>†</sup> |                                          |             |         |             |
|             | AA            | 14    | 21.2 | 11       | 23.9 |                     | 1.0                                      | Ref         | 1.0     | Ref         |
|             | Aa            | 22    | 33.3 | 22       | 47.8 |                     | 0.79                                     | 0.29 – 2.11 | 0.90    | 0.27 – 2.96 |
|             | aa            | 30    | 45.5 | 13       | 28.3 |                     | 1.81                                     | 0.65 – 5.04 | 2.10    | 0.61 – 7.20 |
|             | AA + Aa       | 36    | 54.5 | 24       | 64.9 | 0.0679 <sup>‡</sup> | 2.12                                     | 0.95 – 4.73 | 2.25    | 0.83 – 6.07 |
|             | A allele freq | 0.412 |      | 0.466    |      |                     |                                          |             |         |             |
| <i>BsmI</i> |               |       |      |          |      | 0.5535 <sup>†</sup> |                                          |             |         |             |
|             | bb            | 18    | 26.5 | 10       | 21.7 |                     | 1.0                                      | Ref         | 1.0     | Ref         |
|             | Bb            | 30    | 44.1 | 18       | 39.1 |                     | 0.93                                     | 0.35 – 2.44 | 0.95    | 0.28 – 3.23 |
|             | BB            | 20    | 29.4 | 18       | 39.1 |                     | 0.62                                     | 0.23 – 1.68 | 0.60    | 0.17 – 2.18 |
|             | Bb + bb       | 48    | 70.6 | 28       | 60.9 | 0.5653 <sup>‡</sup> | 1.30                                     | 0.54 – 3.14 | 1.29    | 0.41 – 4.01 |
|             | b allele freq | 0.463 |      | 0.375    |      |                     |                                          |             |         |             |
| <i>TaqI</i> |               |       |      |          |      | 0.4840 <sup>†</sup> |                                          |             |         |             |
|             | TT            | 22    | 32.4 | 20       | 43.5 |                     | 1.0                                      | Ref         | 1.0     | Ref         |
|             | Tt            | 30    | 44.1 | 17       | 37   |                     | 1.60                                     | 0.69 – 3.75 | 1.84    | 0.64 – 5.25 |
|             | tt            | 16    | 23.5 | 9        | 19.6 |                     | 1.62                                     | 0.59 – 4.47 | 1.62    | 0.44 – 6.05 |
|             | Tt + tt       | 52    | 76.5 | 37       | 80.4 | 0.6162 <sup>‡</sup> | 1.27                                     | 0.51 – 3.17 | 1.18    | 0.36 – 3.88 |
|             | t allele freq | 0.434 |      | 0.375    |      |                     |                                          |             |         |             |

\* Adjusted for other factors (skin, age, sun, tan) in a logistic model

<sup>†</sup> Distribution of 3 genotypes

<sup>‡</sup> Distribution of combined genotypes

**eTable 3.** Genotype and Allele Frequencies of the *VDR* Polymorphisms in Women

|             |               | Cases |      | Controls |      | p-value             | Odds Ratios and 95% Confidence Intervals |             |         |              |
|-------------|---------------|-------|------|----------|------|---------------------|------------------------------------------|-------------|---------|--------------|
|             |               | N     | (%)  | N        | (%)  |                     | Crude OR                                 | 95% CI      | Adj OR* | 95% CI       |
| <i>Apal</i> |               |       |      |          |      | 0.5237 <sup>†</sup> |                                          |             |         |              |
|             | AA            | 7     | 24.1 | 13       | 24.1 |                     | 1.0                                      | Ref         | 1.0     | Ref          |
|             | Aa            | 13    | 44.8 | 30       | 55.6 |                     | 0.81                                     | 0.26 – 2.55 | 0.65    | 0.17 – 2.51  |
|             | aa            | 9     | 31.0 | 11       | 20.4 |                     | 1.44                                     | 0.39 – 5.26 | 1.61    | 0.35 – 7.47  |
|             | AA + Aa       | 20    | 69.0 | 43       | 79.6 | 0.2817 <sup>‡</sup> | 1.76                                     | 0.63 – 4.92 | 2.14    | 0.61 – 7.54  |
|             | A allele freq | 0.414 |      | 0.519    |      |                     |                                          |             |         |              |
| <i>BsmI</i> |               |       |      |          |      | 0.2489 <sup>†</sup> |                                          |             |         |              |
|             | bb            | 3     | 10.3 | 5        | 9.3  |                     | 1.0                                      | Ref         | 1.0     | Ref          |
|             | Bb            | 18    | 62.1 | 24       | 44.4 |                     | 1.25                                     | 0.26 – 5.93 | 0.52    | 0.08 – 3.24  |
|             | BB            | 8     | 27.6 | 25       | 46.3 |                     | 0.53                                     | 0.10 – 2.74 | 0.26    | 0.04 – 1.79  |
|             | Bb + bb       | 21    | 72.4 | 29       | 53.7 | 0.8731 <sup>‡</sup> | 1.13                                     | 0.25 – 5.11 | 2.59    | 0.45 – 15.06 |
|             | b allele freq | 0.448 |      | 0.352    |      |                     |                                          |             |         |              |
| <i>TaqI</i> |               |       |      |          |      | 0.5799 <sup>†</sup> |                                          |             |         |              |
|             | TT            | 10    | 34.5 | 25       | 46.3 |                     | 1.0                                      | Ref         | 1.0     | Ref          |
|             | Tt            | 16    | 55.2 | 24       | 44.4 |                     | 1.67                                     | 0.63 – 4.39 | 1.16    | 0.35 – 3.91  |
|             | tt            | 3     | 10.3 | 5        | 9.3  |                     | 1.50                                     | 0.30 – 7.49 | 2.80    | 0.43 – 18.19 |
|             | Tt + tt       | 26    | 89.7 | 49       | 90.7 | 0.8731 <sup>‡</sup> | 1.13                                     | 0.25 – 5.11 | 2.59    | 0.45 – 15.06 |
|             | t allele freq | 0.414 |      | 0.324    |      |                     |                                          |             |         |              |

\* Adjusted for other factors (skin, age, sun, tan) in a logistic model

† Distribution of 3 genotypes

‡ Distribution of combined genotypes

**eTable 4.** Genotype Frequencies by Non-Melanoma Skin Cancer Type

|               |    | Basal Cell Carcinoma (n=40) |      | p-value* | Squamous Cell Carcinoma (n=33) |      | p-value* | Basal/Squamous Cell Carcinoma(n=25) |      | p-value* | p-value† | p-value‡ |
|---------------|----|-----------------------------|------|----------|--------------------------------|------|----------|-------------------------------------|------|----------|----------|----------|
|               |    | N                           | (%)  |          | N                              | (%)  |          | N                                   | (%)  |          |          |          |
| ApaI genotype | A  | 11                          | 29.0 | 0.0952   | 3                              | 9.7  | 0.0529   | 7                                   | 26.9 | 0.8825   | 0.2485   | 0.1286   |
|               | A  | 11                          | 29.0 |          | 13                             | 41.9 |          | 11                                  | 42.3 |          |          |          |
|               | aa | 16                          | 42.1 |          | 15                             | 48.4 |          | 8                                   | 30.8 |          |          |          |
| BsmI genotype | B  | 11                          | 28.2 | 0.4630   | 9                              | 28.1 | 0.5796   | 8                                   | 30.8 | 0.8319   | 0.9970   | 0.9915   |
|               | B  | 19                          | 48.7 |          | 16                             | 50.0 |          | 13                                  | 50.0 |          |          |          |
|               | bb | 9                           | 23.1 |          | 7                              | 21.9 |          | 5                                   | 19.2 |          |          |          |
| TaqI genotype | T  | 13                          | 33.3 | 0.9945   | 11                             | 34.4 | 0.6646   | 8                                   | 30.8 | 0.5489   | 0.9480   | 0.9784   |
|               | T  | 18                          | 46.2 |          | 14                             | 43.8 |          | 14                                  | 53.9 |          |          |          |
|               | tt | 8                           | 20.5 |          | 7                              | 21.9 |          | 4                                   | 15.4 |          |          |          |

\* Distribution of genotypes within each skin cancer type

† Distribution of genotypes among all skin cancer types

‡ Distribution of genotypes between individuals with basal cell carcinoma or squamous cell carcinoma, not both types
